# Supplementary material for: How well can we predict cluster fragmentation inside a mass spectrometer?
Source: Royal Society of Chemistry journal article supplement (doi:10.1039/c9cc02896j), 2019-01-01
Supplement: c9cc02896j1.pdf [file c9cc02896j1.pdf]

## Supporting Information

# How Well Can We Predict Cluster Fragmentation Inside a Mass Spectrometer?

*Monica Passananti,<sup>\*a,b</sup> Evgeni Zapadinsky,<sup>a</sup> Tommaso Zanca,<sup>a</sup> Juha Kangasluoma,<sup>a,c</sup> Nanna Myllys,<sup>a,d</sup> Matti P. Rissanen,<sup>a</sup> Theo Kurtén,<sup>e</sup> Mikael Ehn,<sup>a</sup> Michel Attoui<sup>f</sup> and Hanna Vehkamäki<sup>a</sup>*

<sup>a</sup> Institute for Atmospheric and Earth System Research / Physics, Faculty of Science, University of Helsinki, Finland

<sup>b</sup> Present address: Dipartimento di Chimica, Università di Torino, Via Giuria 5, 10125 Torino, Italy.

<sup>c</sup> Aerosol and Haze Laboratory, Beijing Advanced Innovation Center for Soft Matter Science and Engineering, Beijing University of Chemical Technology, 100029 Beijing, China

<sup>d</sup> Present address: Department of Chemistry, University of California, Irvine, California 92697-2025, United States

<sup>e</sup> Institute for Atmospheric and Earth System Research / Chemistry, Faculty of Science, University of Helsinki, Finland

<sup>f</sup> LISA, University Paris Est Creteil, Creteil, 94010, France

**Corresponding Author**

\* E-mail: monica.passananti@helsinki.fi

## 20 Table of Contents

|    |                                                                 |    |
|----|-----------------------------------------------------------------|----|
| 21 | 1. Chemicals .....                                              | 2  |
| 22 | 2. Experimental set-up .....                                    | 2  |
| 23 | 3. Fragmentation experiments and transmission measurement ..... | 4  |
| 24 | 4. Quantum chemistry calculations.....                          | 13 |
| 25 | 5. Fragmentation rate constants and density of states.....      | 15 |
| 26 | 6. Short description of the model.....                          | 17 |
| 27 | 7. Effect of carrier gas properties.....                        | 20 |
| 28 | 8. Modelling the pressure inside the APi.....                   | 21 |
| 29 | 9. Uncertainties evaluation of the simulations.....             | 22 |
| 30 | 10. References.....                                             | 25 |

31

32

33

### 34 1. Chemicals

35 All chemicals were used without further purification: sulfuric acid (H<sub>2</sub>SO<sub>4</sub>) (95-97%), Terephthalic  
36 acid (98%), malonic acid (99%), 1-Ethyl-3-methylimidazolium bis(trifluoromethylsulfonyl)imide  
37 (EMIM BTI) (>98%), 1-Ethyl-3-methylimidazolium dibutyl phosphate (EMIM DBP) (>97%) and  
38 tetraheptylammonium bromide (THAB) (>99%) were obtained from Sigma Aldrich. Solutions are  
39 prepared with methanol HPLC fluorescence grade (purchased from Fisher Chemical) and deionized  
40 ultra-pure aerated Milli-Q water from Millipore.

41

### 42 2. Experimental set-up

43 The experiments were carried out using an ElectroSpray Ionization Differential Mobility Analyser  
44 Atmospheric Pressure interface Time Of Flight mass spectrometer (ESI-DMA-APi-TOF). A  
45 schematic representation of the experimental set-up can be found in the main text (Figure 1).

46 A solution of sulfuric acid 200 mM in water/methanol 1/1 v/v was used to generate negatively charged  
47 sulfuric acid clusters by ESI. The electrospray was generated applying a negative voltage to the  
48 solution and a positive pressure was used to drive the solution through the silica capillary (30  $\mu\text{m}$  tip  
49 i.d., 360  $\mu\text{m}$  o.d., non-coated, SilicaTip<sup>TM</sup>, PicoTip<sup>TM</sup> EMITTER, NewObjective). We decided to  
50 work in negative mode because sulfuric acid is usually detected with nitrate-CI-APi-TOF in negative  
51 mode.<sup>[1]</sup> The generated charged clusters were separated with a high resolution Herrmann-type DMA  
52 operating with a flow of 10 L/min, a description of the DMA is published elsewhere.<sup>[2]</sup> The DMA  
53 mobility classification was calibrated before each experiment with THAB positive monomer. The  
54 resolution was calculated from the THAB positive monomer peak, and it is defined as the ratio of the  
55 DMA voltage at the maximum of the peak and full width at half maximum (FWHM). Using a  
56 Gaussian fit to calculate the FWHM a resolution of 19.7 was obtained. To the DMA was connected  
57 a TSI aerosol electrometer (model 3068B) with an inlet flow rate of 5 L/min and the APi-TOF with  
58 an inlet flow rate of 0.8 L/min. The APi-TOF (Tofwerk AG, Thun, Switzerland) consists of an  
59 atmospheric pressure interface (APi), made by three vacuum chambers, coupled with a time-of-flight  
60 mass spectrometer. The pressure decreases between successive chambers until reducing to  $10^{-6}$  mbar  
61 at the time of flight mass spectrometer. In the first two chambers the ions are guided through  
62 quadrupoles (Q1 and Q2), while in the last chamber (3<sup>rd</sup> chamber) several lenses focus the ions. In  
63 total, 27 voltages and 2 radio frequencies are applied to the APi-TOF, most of which can be changed  
64 to optimize the results as a function of the specific application of the instrument. A more detailed  
65 description of the instrument is reported elsewhere.<sup>[3]</sup> The APi-TOF was operated in negative mode  
66 and the data were analysed using a Matlab-based set of programs (tofTools) developed at the  
67 University of Helsinki.

68

69 3. Fragmentation experiments and transmission measurement

70 We chose one voltage configuration with a relatively low fragmentation fraction (30% of  $(SA)_3^-$   
71 fragmentation) and a relatively high signal-to-noise ratio ( $SNR = 80$  for  $(SA)_3^-$  averaging time 30  
72 seconds) as our standard configuration. The fragmentation experiments were carried out by changing,  
73 one at a time, all the voltages applied to the atmospheric pressure interface (APi), in total 13 voltages,  
74 without changing the radiofrequencies. A schematic representation of the APi is reported in Figure  
75 S1. Only the Deflector and Deflector Flange were changed together because they are used to orient  
76 the ion beam. We calculated the percentage ratio of sulfuric acid monomer ( $R_{(SA)_1^-}$ ), dimer ( $R_{(SA)_2^-}$ )  
77 and trimer ( $R_{(SA)_3^-}$ ) using the following formula:

78 
$$R_{(SA)_i^-} = \frac{(SA)_i^-}{\sum_{i=1}^N (SA)_i^-} \times 100$$
 eq.1

79 with  $N=3$ .

80

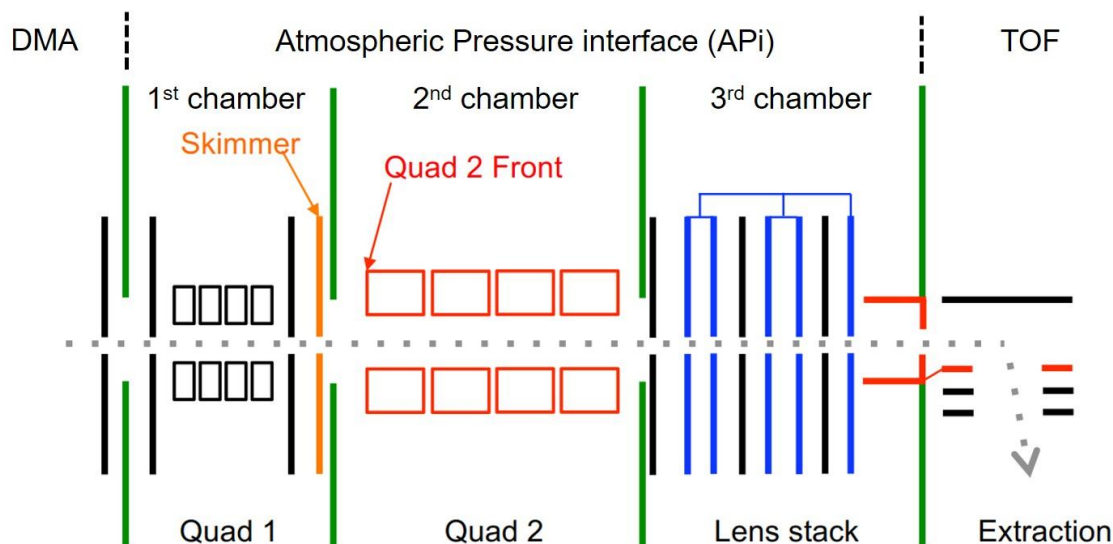

81

82 Figure S1. A schematic of the voltages in the APi region of the Tofwerk ToF-MS (modified from  
83 Lopez-Hilfiker et al. 2016).<sup>[4]</sup>

84

85 The fragmentation was measured for 76 different voltage configurations. It is important to note that  
86 the range of voltages applied to these electrodes were large, in some cases the applied voltage was  
87 100 V lower or 80 V higher than in the standard configuration.

88 The voltage configuration of the instrument can affect not only the fragmentation of clusters but also  
89 the mass-dependent transmission efficiency.<sup>[5]</sup> To verify that the observed change in the ratio between  
90  $(SA)_2^-$  and  $(SA)_3^-$  is due to fragmentation, and not to transmission changes, we measured the relative  
91 ion transmission for the size region of  $(SA)_1^-$ ,  $(SA)_2^-$  and  $(SA)_3^-$ , for a set of representative  
92 configurations (24 voltage configurations). The transmission (T) of the APi-TOF is defined as the  
93 fraction of ions reaching the detector out of the ions reaching the inlet, and it takes into account the  
94 ion losses from the inlet until the detector. It strongly depends on the voltage configuration of the  
95 instrument and it is a mass-dependent.<sup>[3, 5]</sup> This means that small ions (low masses) may have higher  
96 transmission compared to large ions (high masses) for some voltage configurations, and the opposite  
97 for some other configurations. The transmission can be measured by selecting a mono-mobile ion  
98 size distribution from the DMA, and comparing the counts in the APi-TOF to those of the  
99 electrometer. The electrometer and the inlet of the APi-TOF (Nozzle) were equidistant from the exit  
100 of the DMA, therefore we considered that the ion losses in these regions are equivalent. Four different  
101 molecular ions (produced by ionizing molecules or ionic liquids) were used for the transmission  
102 measurement, these ions are very unlikely to fragment in the instrument due to their chemical  
103 structure. They were produced by spraying malonic acid, terephthalic acid, EMIM BTI and EMIM  
104 DBP in the negative mode. The ion monomer of each molecule was selected with the DMA. The  
105 mass of these ions cover the mass range of interest (from around 100m/z to 300m/z). While the  
106 absolute transmission for different voltage configurations was quite different (see Figure S2), the  
107 differences between the relative transmissions of  $(SA)_1^-$ ,  $(SA)_2^-$  and  $(SA)_3^-$  were small. The signal  
108 intensity (ions/second) of sulfuric acid monomer, dimer and trimer was recalculated according to the  
109 ion transmission. The transmission correction changes the ratio between  $(SA)_2^-$  and  $(SA)_3^-$  only by

110 approximately 5%. The highest change in the  $R_{(SA)_3^-}$  due to the transmission correction was of 14.6%  
111 and in average a 7.6% of change was observed due to the transmission change. The effect of the mass-  
112 dependent transmission efficiency is small mainly because the mass range of interest is relatively  
113 small (less than 100 m/z difference between sulfuric acid dimer and trimer),<sup>[3]</sup> and we did not change  
114 the settings that have a significant impact on the mass-dependent transmission efficiency, namely  
115 radiofrequencies and radiofrequencies amplitude voltages applied to the quadrupoles (Q1 and Q2),  
116 and voltages applied in the TOF.<sup>[5]</sup>

117

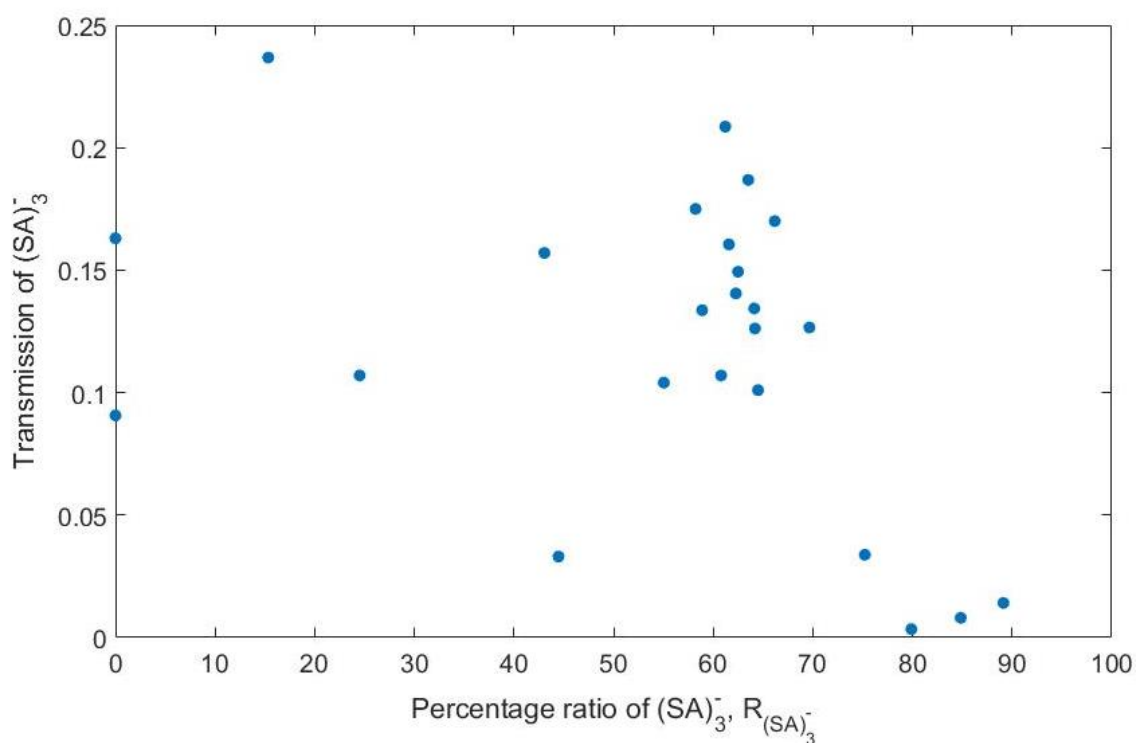

118

119 Figure S2. Absolute transmission of  $(SA)_3^-$  as a function of percentage ratio of surviving sulfuric  
120 acid trimer negatively charged ( $R_{(SA)_3^-}$ ).

121

122 The percentage ratio between the signal of sulfuric acid monomer, dimer and trimer in all tested  
123 conditions are reported in Figure S3 to Figure S14, and for the cases where transmission has been  
124 measured, the data corrected by transmission changes are also shown in the figures. When no bar is

125 reported for a specific voltage value, it means that for the corresponding voltage configuration the  
126 ion transmission was zero and no ions reached the detector. This was the case for 8 conditions (voltage  
127 configurations).

128

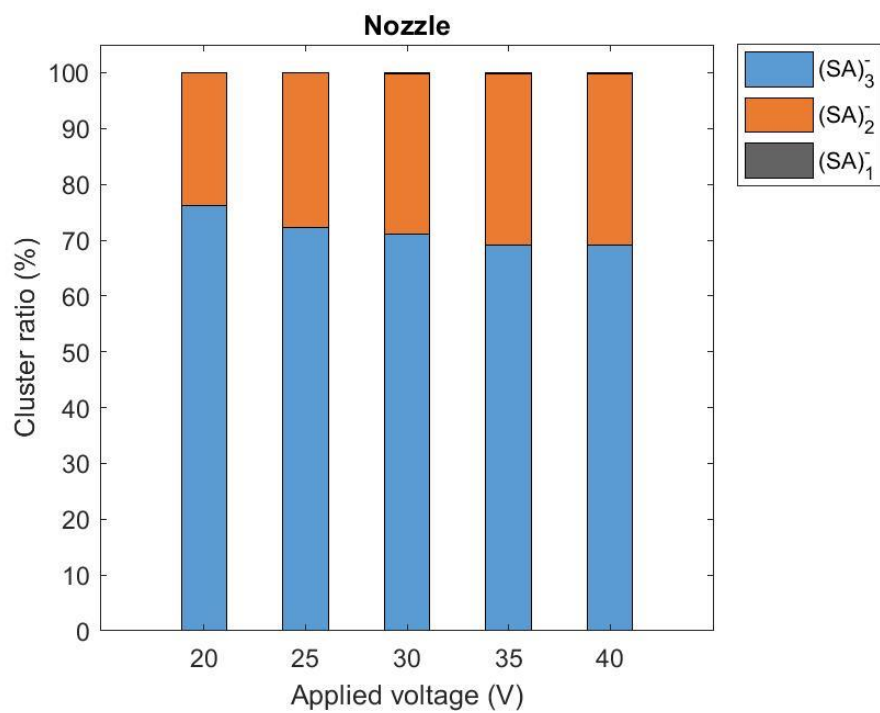

129

130 Figure S3. Percentage ratio of (SA)<sub>1</sub><sup>-</sup>, (SA)<sub>2</sub><sup>-</sup> and (SA)<sub>3</sub><sup>-</sup> for different voltages applied to Nozzle.

131

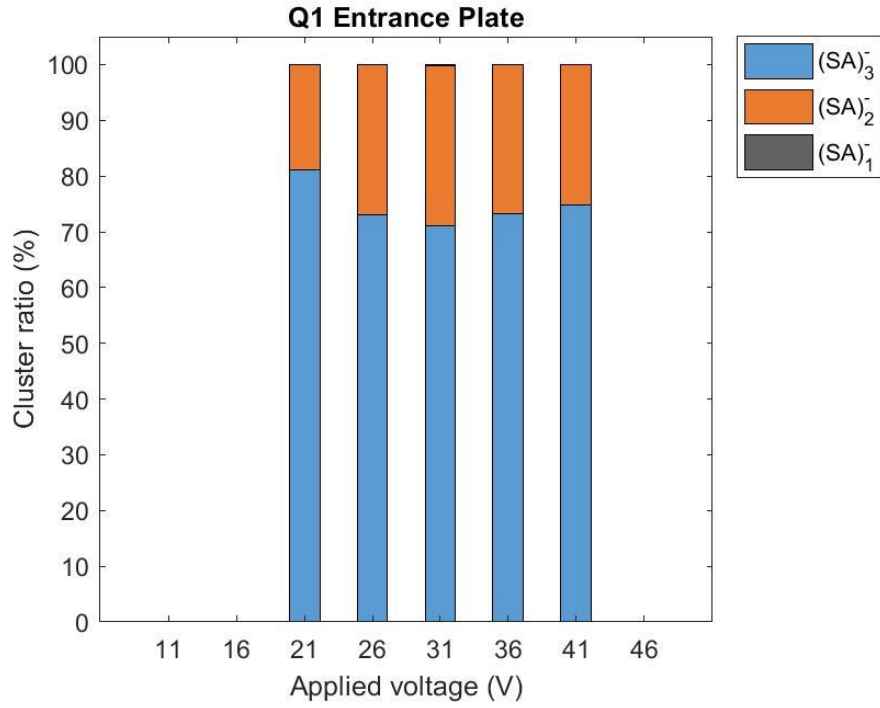

132

133

Figure S4. Percentage ratio of  $(SA)_1^-$ ,  $(SA)_2^-$  and  $(SA)_3^-$  for different voltages applied to Q1 Entrance Plate (Q1 EP).

134

135

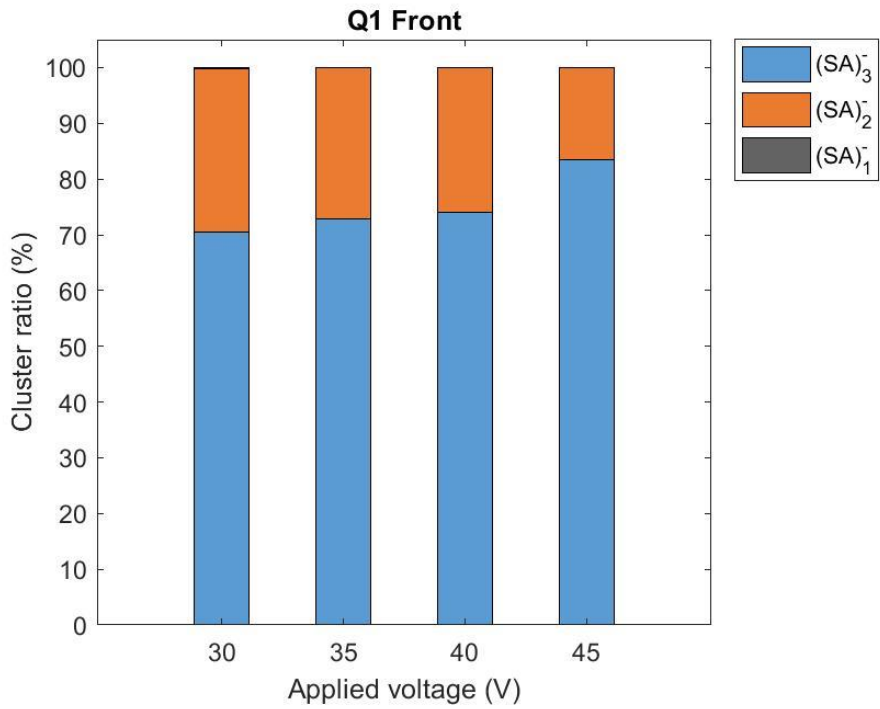

136

137

Figure S5. Percentage ratio of  $(SA)_1^-$ ,  $(SA)_2^-$  and  $(SA)_3^-$  for different voltages applied to Q1 Front.

138



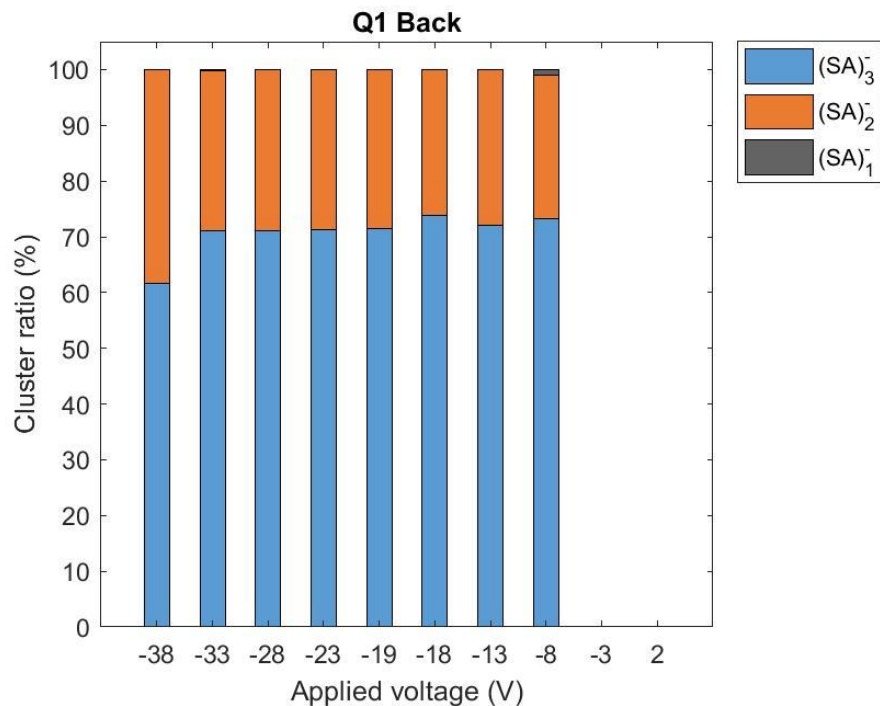

139

140

Figure S6. Percentage ratio of  $(SA)_1^-$ ,  $(SA)_2^-$  and  $(SA)_3^-$  for different voltages applied to Q1 Back.

141

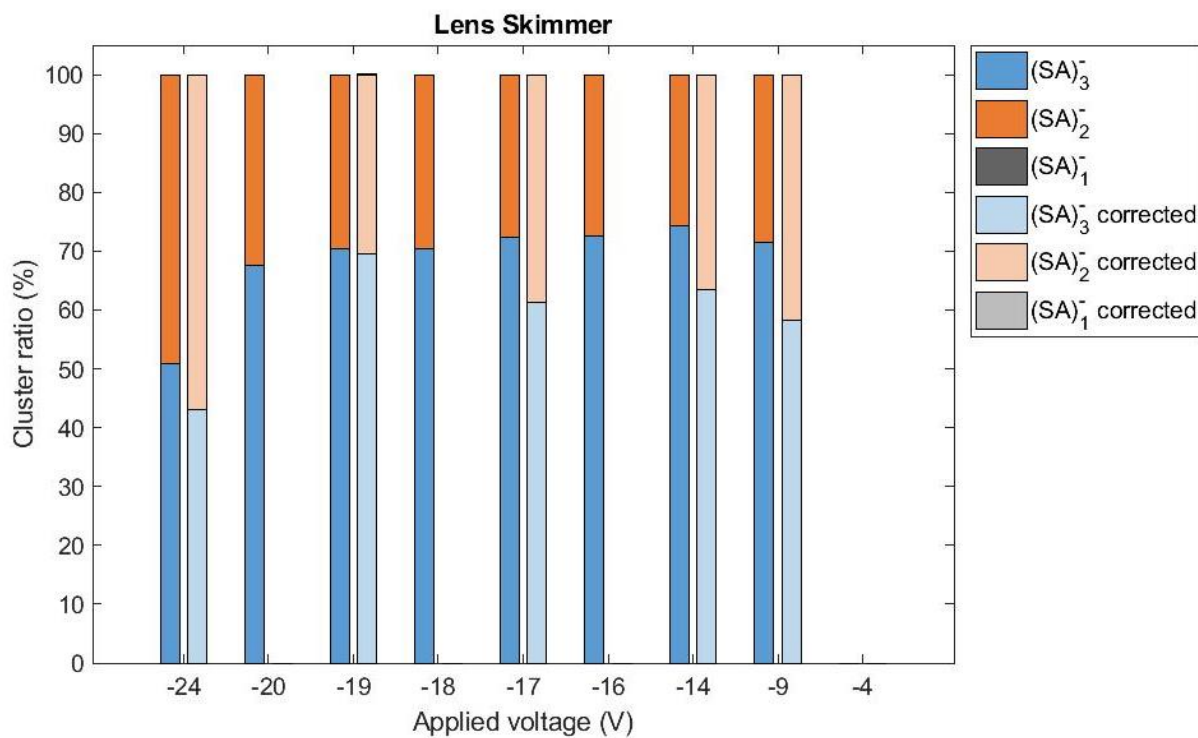

142

143

Figure S7. Percentage ratio of  $(SA)_1^-$ ,  $(SA)_2^-$  and  $(SA)_3^-$  for different voltages applied to Lens Skimmer (darker colours). The ratios corrected by the transmission are reported in lighter colours.

144

145

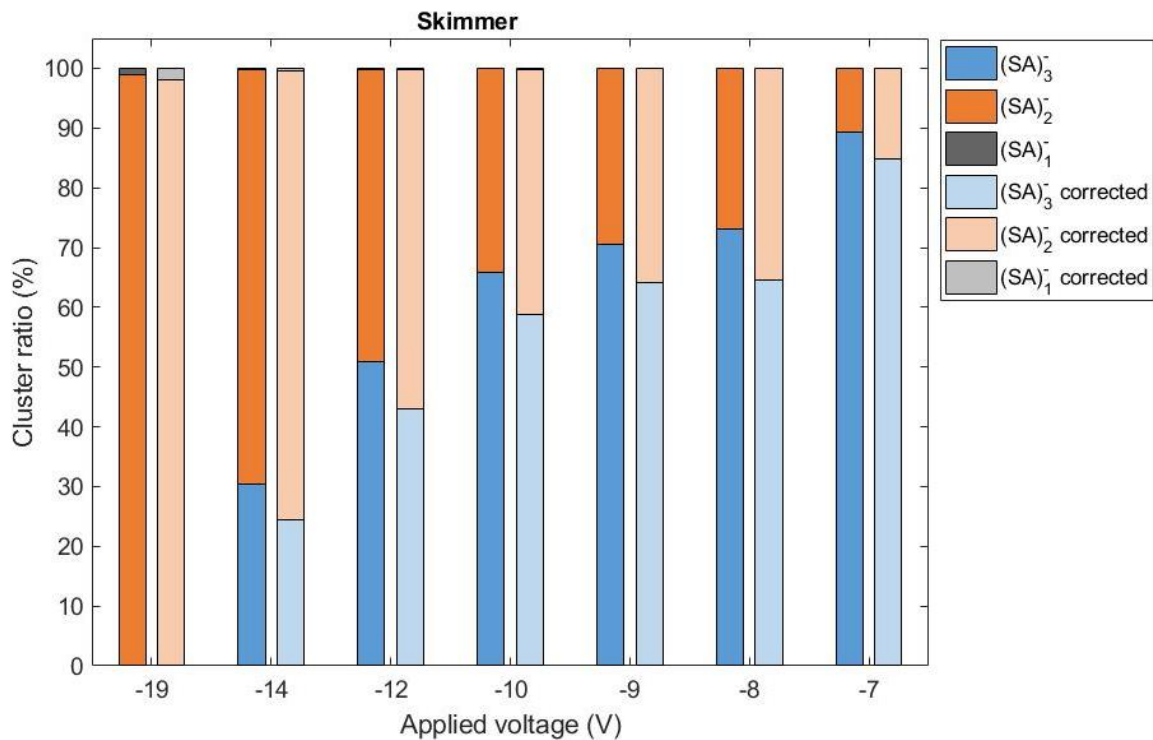

146

147 Figure S8. Percentage ratio of  $(SA)_1^-$ ,  $(SA)_2^-$  and  $(SA)_3^-$  for different voltages applied to Skimmer  
 148 (darker colours). The ratios corrected by the transmission are reported in lighter colours.

149

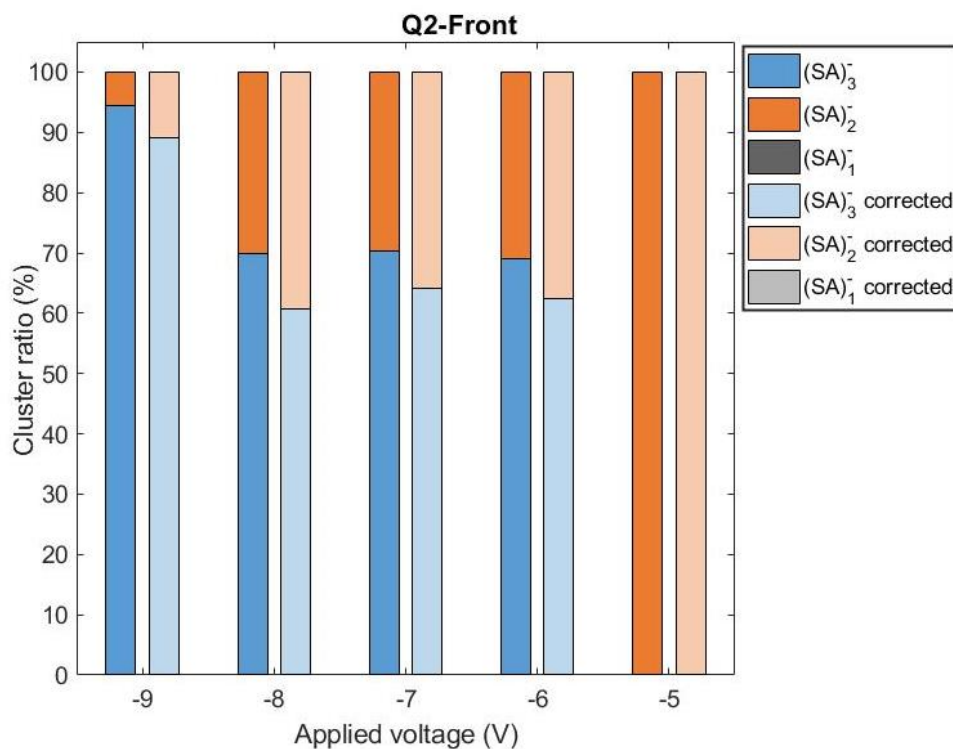

150

151 Figure S9. Percentage ratio of  $(SA)_1^-$ ,  $(SA)_2^-$  and  $(SA)_3^-$  for different voltages applied to Q2 Front  
 152 (darker colours). The ratios corrected by the transmission are reported in lighter colours.

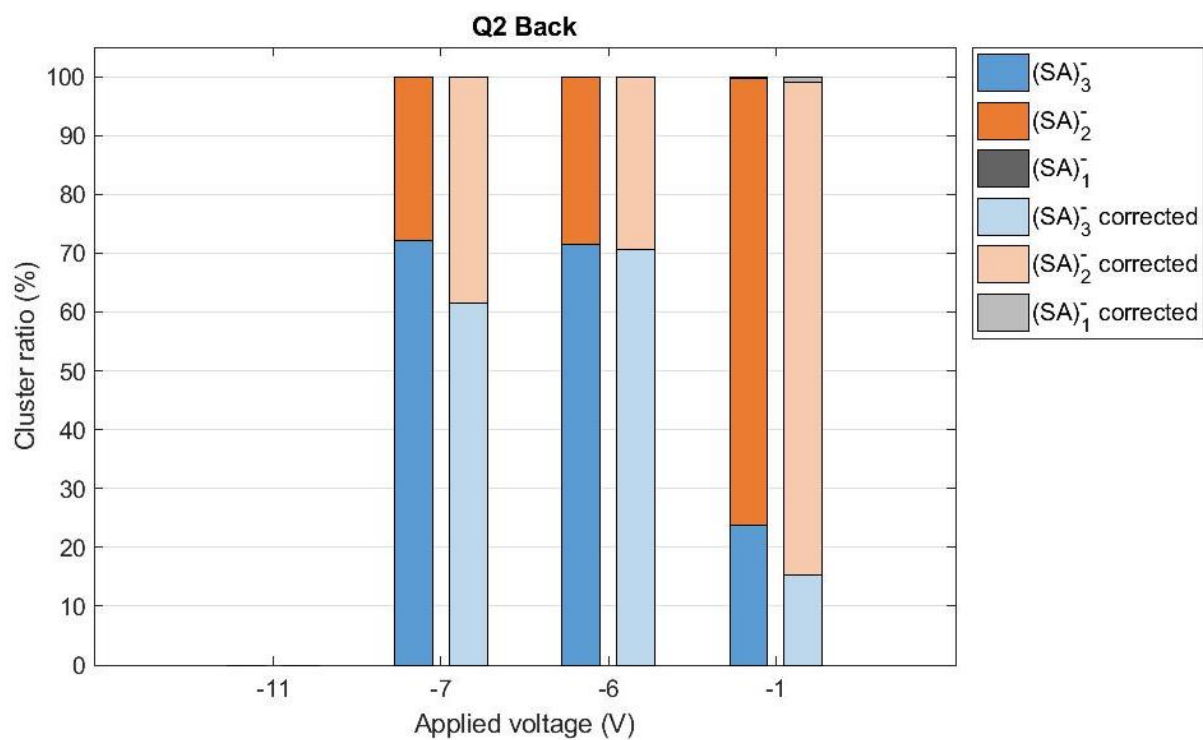

154

155

Figure S10. Percentage ratio of  $(SA)_1^-$ ,  $(SA)_2^-$  and  $(SA)_3^-$  for different voltages applied to Q2 Back (darker colours). The ratios corrected by the transmission are reported in lighter colours.

156

157

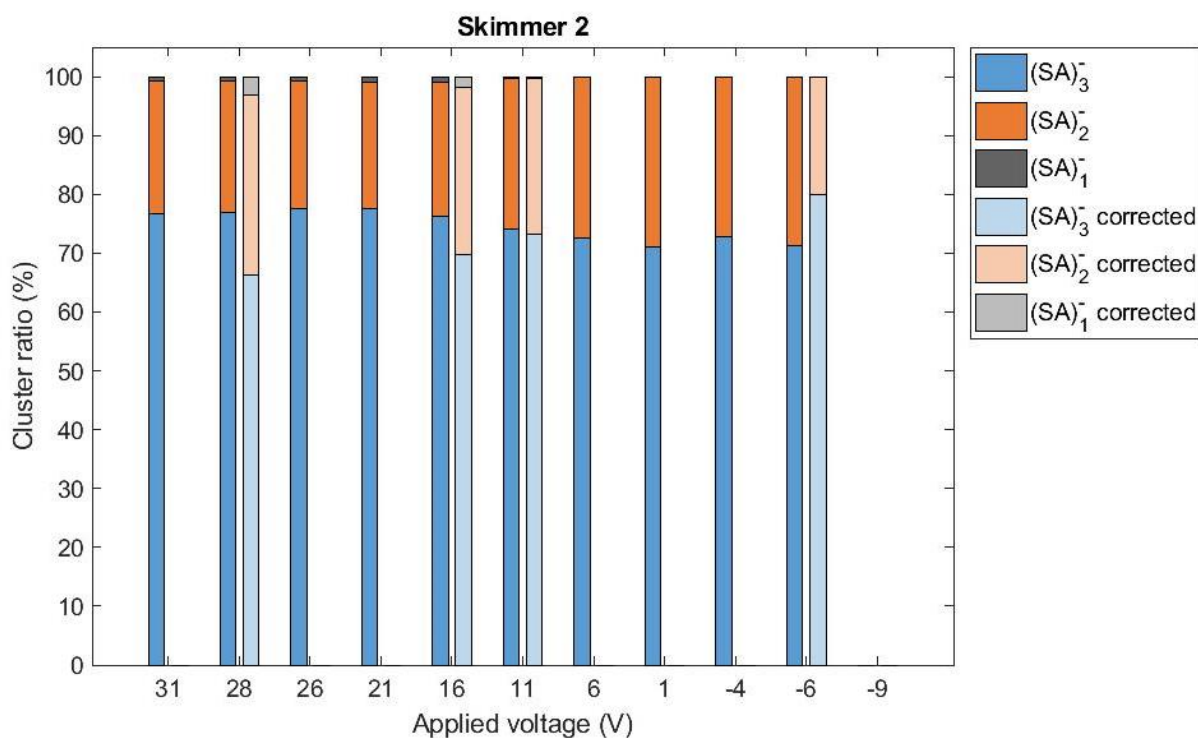

158

159

Figure S11. Percentage ratio of  $(SA)_1^-$ ,  $(SA)_2^-$  and  $(SA)_3^-$  for different voltages applied to Skimmer 2 (darker colours). The ratios corrected by the transmission are reported in lighter colours.

160

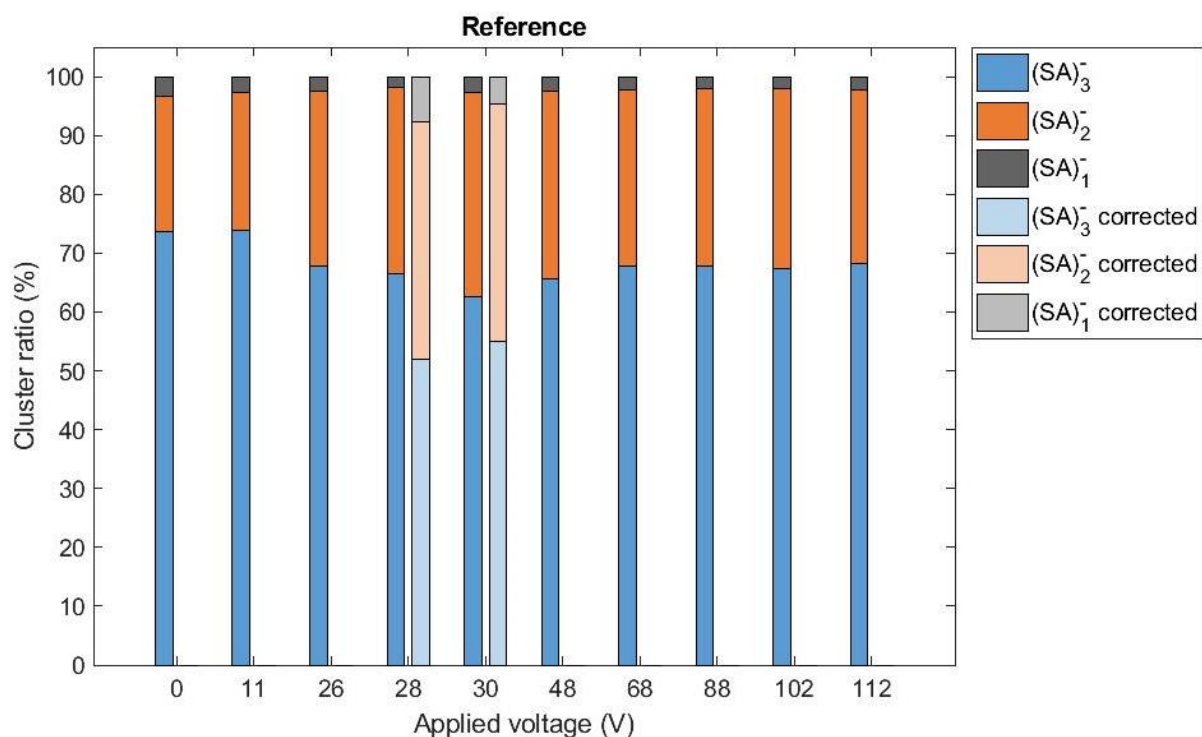

162

163 Figure S12. Percentage ratio of  $(SA)_1^-$ ,  $(SA)_2^-$  and  $(SA)_3^-$  for different voltages applied to Reference  
 164 (darker colours). The ratios corrected by the transmission are reported in lighter colours.

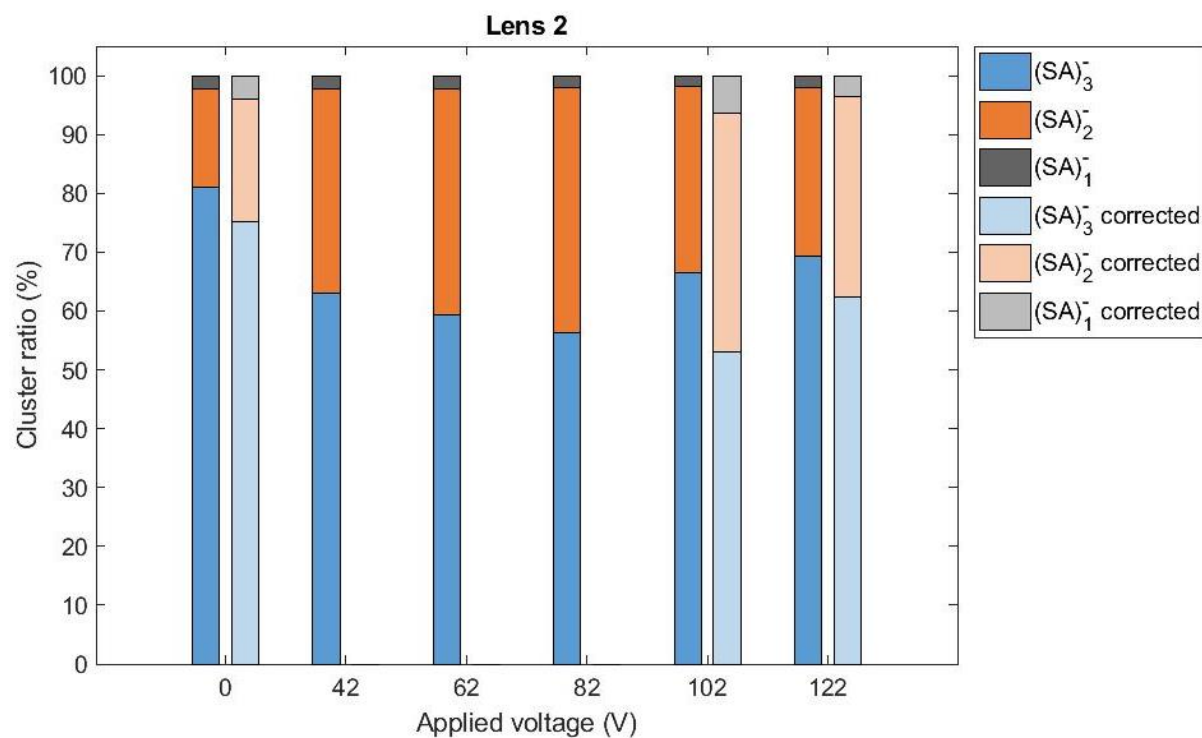

165

166 Figure S13. Percentage ratio of  $(SA)_1^-$ ,  $(SA)_2^-$  and  $(SA)_3^-$  for different voltages applied to Lens 2  
 167 (darker colours). The ratios corrected by the transmission are reported in lighter colours.

168

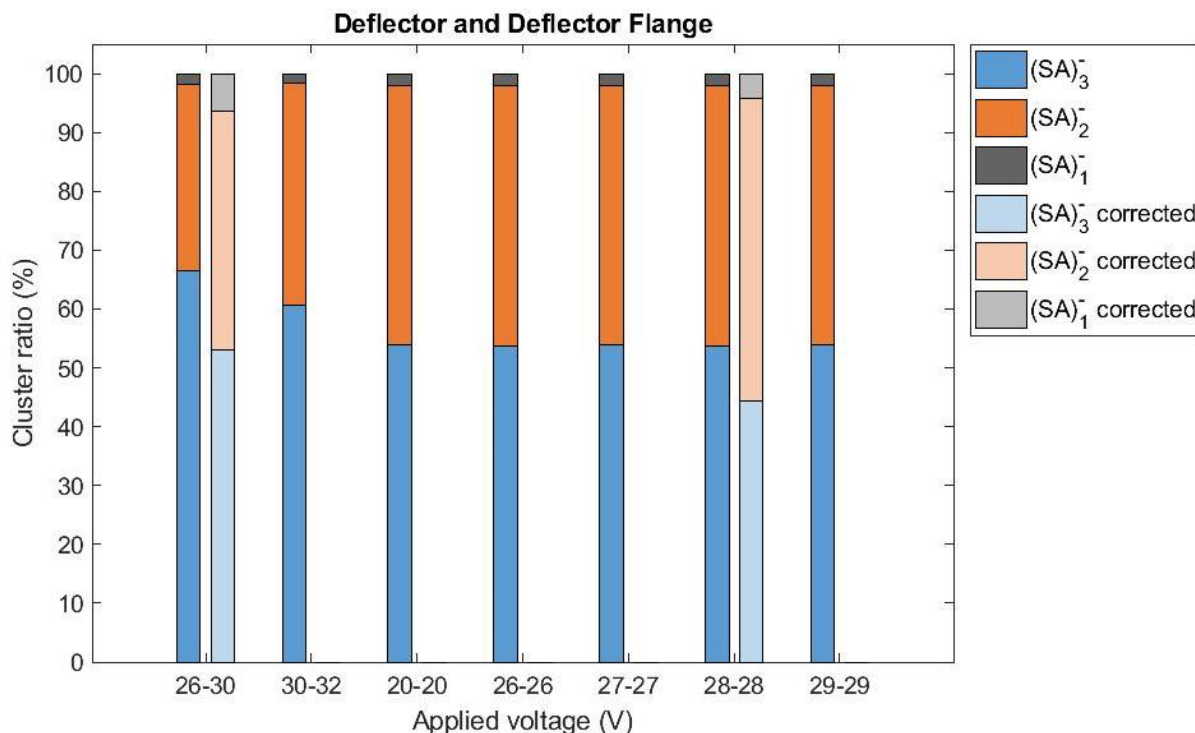

169

170 Figure S14. Percentage ratio of  $(SA)_1^-$ ,  $(SA)_2^-$  and  $(SA)_3^-$  for different voltages applied to Deflector  
 171 and Deflector Flange (darker colours). The ratios corrected by the transmission are reported in  
 172 lighter colours.

173

174

175 **4. Quantum chemistry calculations**

176 There are three possible fragmentation pathways for the sulfuric acid trimer:

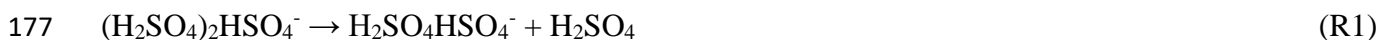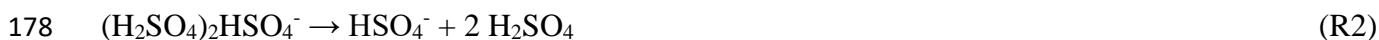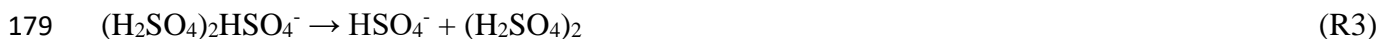

180 To define the most favourable fragmentation pathway of sulfuric acid trimer and the fragmentation  
 181 rates used in our statistical model, we calculated zero point energy (ZPE) corrected fragmentation  
 182 energies for pathways R1, R2, and R3. ZPE results from the vibrational motion of molecular systems  
 183 even at 0 K and is calculated for a harmonic oscillator model as a sum of contributions from all  
 184 vibrational modes of the system. All geometry optimizations and vibrational frequency calculations

185 were carried out in Gaussian 09 Rev. D.01.<sup>[6]</sup> Single point energy calculations were run using the  
186 Orca 4.0.1.2 program.<sup>[7]</sup> We used the semiempirically guided technique<sup>[8]</sup> to obtain the minimum  
187 energy structures for the clusters. First we created 200, 1000, and 2800 random cluster structures for  
188  $(SA)_2^-$ ,  $(SA)_2$ , and  $(SA)_3^-$ , respectively. The structures were subsequently optimized using the  
189 semiempirical PM6 method,<sup>[9]</sup> and all converged structures were then re-optimized at the DFT level  
190 PW91/6-31+G\*.<sup>[10]</sup> The different structures were then characterized based on electronic energies and  
191 dipole moments, which were further optimized at the PW91/6-311++G\*\* level of theory. Vibrational  
192 frequencies were also calculated at this level. Different conformations are sorted based on the ZPE-  
193 corrected electronic energies ( $E_0$ ), and the final optimization and frequency calculation were  
194 performed at the PW91/aug-cc-pVQZ level of theory for one, four, and 22 lowest  $E_0$  conformations  
195 of  $(SA)_2^-$ ,  $(SA)_2$ , and  $(SA)_3^-$  clusters, respectively. The electronic energy corrections are calculated  
196 on top of the DFT structures using DLPNO-CCSD(T)/aug-cc-pVTZ level of theory with a tight pair  
197 natural orbital criteria.<sup>[11]</sup> The lowest  $E_0$  conformations at the DLPNO-CCSD(T)/aug-cc-pVTZ//  
198 PW91/aug-cc-pVQZ level are used to calculate ZPE-corrected fragmentation energies, which are for  
199 reaction (R1) 29.3 kcal/mol (Figure S15), reaction (R2) 76.4 kcal/mol and reaction (R3) 58.1  
200 kcal/mol.

201

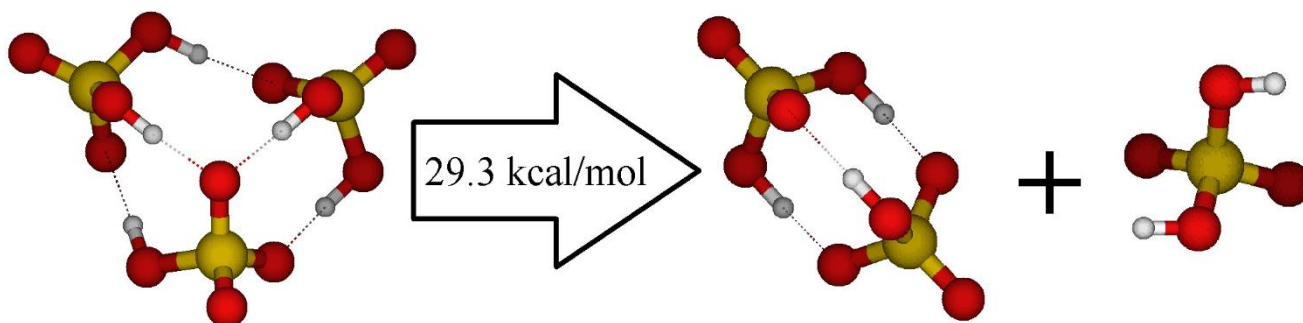

202

203

Figure S15. The fragmentation of  $(SA)_3^-$  cluster to  $(SA)_2^-$  and SA parts. Colour coding:

204

yellow=sulfur, red=oxygen, and white=hydrogen.

205

206

## 207 5. Fragmentation rate constants and density of states

208 The ions are accelerated under the electrical field and collide with the carrier gas with velocities much  
209 higher than thermal velocities. As a consequence, the energy transferred to the internal modes of the  
210 ions also considerably differs from the thermal case. Therefore, to judge the fate of the ions inside  
211 the mass spectrometer, we cannot rely only on thermodynamic data. Instead, we need to know the  
212 fragmentation rate constant as a function of the energy of the ion rather than the temperature of the  
213 carrier gas. Note that the naive approach to relate the energy to temperature through ratios such as  
214  $E = kT$  ( $k$  is the Boltzmann constant) does not work, since computing a temperature-dependent rate  
215 constant requires that the energy of the ions obeys the Boltzmann distribution (which is not the case  
216 here).

217 In all unimolecular reaction theories, the key value defining the rate constant is the ratio of the  
218 combined density of states of the products to the density of states of the reactant. The pre-factor to  
219 this ratio differs from theory to theory. To calculate it we have used the detailed balance approach  
220 and the recipe to take into account conservation of the momentum and angular momentum developed  
221 in the paper by Zapadinsky et al.<sup>[12]</sup> All computational details can be found there.

222 The densities of states have been calculated with the frequencies and rotational constants obtained for  
223 minimum energy conformers. The fragmentation energies have been calculated using electronic  
224 energies for the products and reactants corrected with zero-point energy value. The quantum chemical  
225 methods are the same as in the previous section.

226 The fragmentation rate constants of  $(SA)_3^-$  for all possible channels are presented in Figure S16. The  
227 fragmentation rate constants reported in Figure S16 have been derived from quantum chemistry data  
228 calculated at the PW91/aug-cc-pVQZ level of theory.

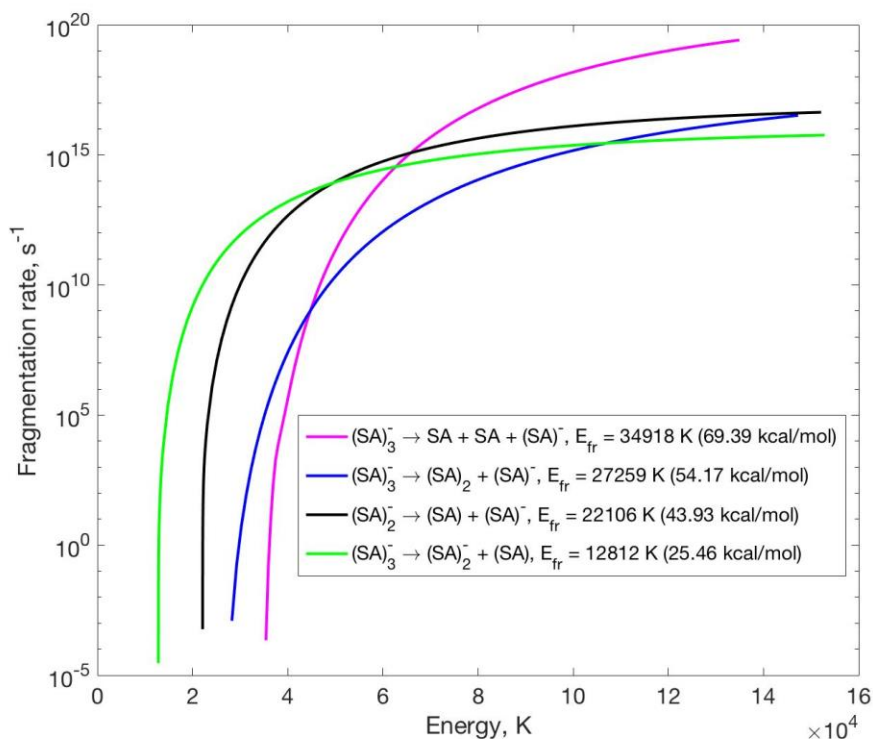

229

230 Figure S16. The fragmentation rate constants of (SA)<sub>3</sub><sup>-</sup> and (SA)<sub>2</sub><sup>-</sup> for all pathways.

231

232 Based on the rate constants, we can conclude that the only possible pathway for fragmentation of the  
 233 trimer is R1. Other channels are completely negligible at times between the collisions with the carrier  
 234 gas and for typical energy transfers occurring during one collision in the conditions of the experiment.  
 235 The charged sulfuric acid monomers can be observed in the experiment only due to the secondary  
 236 process following the pathway R1. The energies necessary for the fragmentation of (SA)<sub>2</sub><sup>-</sup> are  
 237 reachable in the experiment. The fragmentation rate constant of (SA)<sub>2</sub><sup>-</sup> is also presented in Figure  
 238 S16.

239



## 240 6. Short description of the model

241 Our model describes the ion's trajectory through the API, and the collisions between the ion and the  
242 carrier gas molecules. During the collision, energy is transferred to the cluster, which can then  
243 fragment due to the excess of energy. In our model, we consider the trajectory and the fate of each  
244 ion as an individual run, which we call a realization. The ion moves under the electric field, and  
245 experiences collisions with the carrier gas.

246 To simulate the trajectory of clusters inside the quadrupole we consider that the ion moves only under  
247 the electric field defined by the voltages applied to the beginning and to the end of the quadrupole.  
248 We modelled the effect of the alternating voltage applied to the quadrupole on the cluster  
249 fragmentation, and observed that the effect is negligible. The main effect of the applied  
250 radiofrequencies is to decrease the velocities of the clusters in the transverse directions, and to focus  
251 them along the main axis chamber. Since the transverse velocity is much less than the velocity along  
252 the main axis, its contribution to the probability of collision is negligible. Hence the probability of  
253 fragmentation is also not affected.

254 The collision frequency between carrier gas molecules and clusters is governed by the probability  
255 density function (PDF) depending on the density and temperature of the carrier gas and the velocity  
256 of the ion. At the collision, the translational energy can be transferred to rotational and vibrational  
257 energy of the ion. The amount of transferred energy is defined by PDFs calculated on the basis of the  
258 conservation laws (energy, momentum and angular momentum), microcanonical ensemble principle  
259 and the vibrational density of states of the ion. The conservation laws are considered separately for  
260 the normal and tangential (with respect to the ion) components of the velocity of the carrier gas. Under  
261 the term microcanonical ensemble principle, we imply that all microstates having the same energy  
262 occur with equal probability. The normal component transfers energy to the vibrational and  
263 translational modes of the ion, while the tangential component transfers energy to the rotational and

264 translational modes. The amount of energy transferred to the vibrational modes of the ion is defined  
265 by the vibrational density of states. The amount of energy transferred to the rotational modes of the  
266 ion is defined by the conservation laws.

267 After the collision, there is an exchange energy between the vibrational and rotational modes of the  
268 ion. This process is governed by a PDF defined by the vibrational and rotational densities of states.  
269 In the period between the collisions, there is a chance for the fragmentation of the ion. The probability  
270 of fragmentation is governed by a PDF defined by the fragmentation rate constant.

271 All computational details can be found in the paper by Zapadinsky et al.<sup>[12]</sup>

272 The simulation process can be divided in 6 steps (Scheme S1):

- 273 1. Initial settings of the all modes of the cluster. For rotational and vibrational modes, we have used  
274 random values taken from the Boltzmann distribution at 300 K. For the translational modes, we  
275 used either fixed values or random velocities from the Maxwell distribution at 300 K. For both  
276 cases we had identical fragmentation rates.
- 277 2. The cluster moves in the electric field. From an appropriate probability density function (PDF),  
278 depending on the carrier gas density, temperature and velocity of the cluster, a time of the next  
279 collision with a carrier gas molecule is defined.
- 280 3. Check if fragmentation occurs before the next collision, or before the ion reaches the end of the  
281 simulated region. The fragmentation PDF is defined by the rate constant depending on the cluster  
282 energy. There are three possibilities:
  - 283 • the ion reaches the end of the simulated region, the cluster is counted as survived, and a new  
284 cluster trajectory (realization) is started.
  - 285 • if fragmentation occurs, the cluster is counted as fragmented, and a new cluster trajectory  
286 (realization) is started.
  - 287 • if fragmentation does not occur, the simulation continues with step 4.

- 288 4. A random collision point at the cluster surface and direction is assigned for the carrier gas molecule  
 289 collision. The point and direction of the collision follow an appropriate PDF as the cluster is  
 290 moving in a certain direction relative to the carrier gas.
- 291 5. At the collision, the translational energy of the carrier gas molecule is transferred to rotational and  
 292 vibrational energy of the ion.
- 293 6. The energy is redistributed among rotational and vibrational energy modes according to the  
 294 conservation laws, and a PDF defined by the density of states. The simulation continues from  
 295 step 2 until fragmentation occurs, or until the cluster reaches the end of the modelled region.  
 296

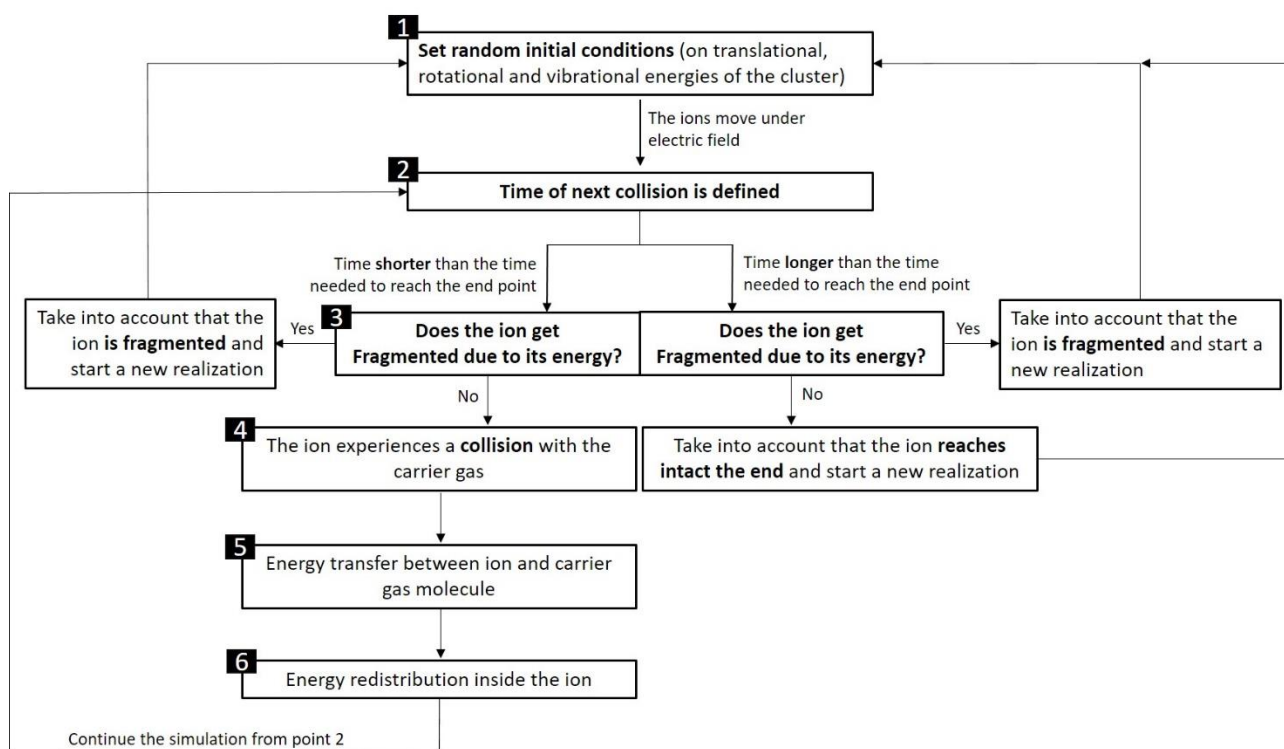

297

298 Scheme S1. Flow chart of the simulation.

299

300

301 7. Effect of carrier gas properties

302 In our simulations, we used air as carrier gas and we defined the properties of the carrier gas as an  
303 average between N<sub>2</sub> and O<sub>2</sub>, according to the relative abundance in the atmosphere. More details  
304 about the carrier gas properties are reported in Zapadinsky et al.<sup>[12]</sup> It is important to notice that we  
305 neglect the effect of long-range interaction on the collision frequency due to the low polarizability of  
306 N<sub>2</sub> and O<sub>2</sub>.<sup>[13]</sup> Also in case of noble gases (e.g. argon, helium) as carrier gas, as often used in other  
307 MS analysis, this assumption is valid.

308 One of the properties of the carrier gas that can significantly affect the fragmentation is the cross  
309 section. We have simulated the fragmentation of sulfuric acid trimer negatively charged using  
310 different collision radius to evaluate the effect of the collision cross section on cluster fragmentation.  
311 The results of the simulations are reported in figures S17 and S18.

312

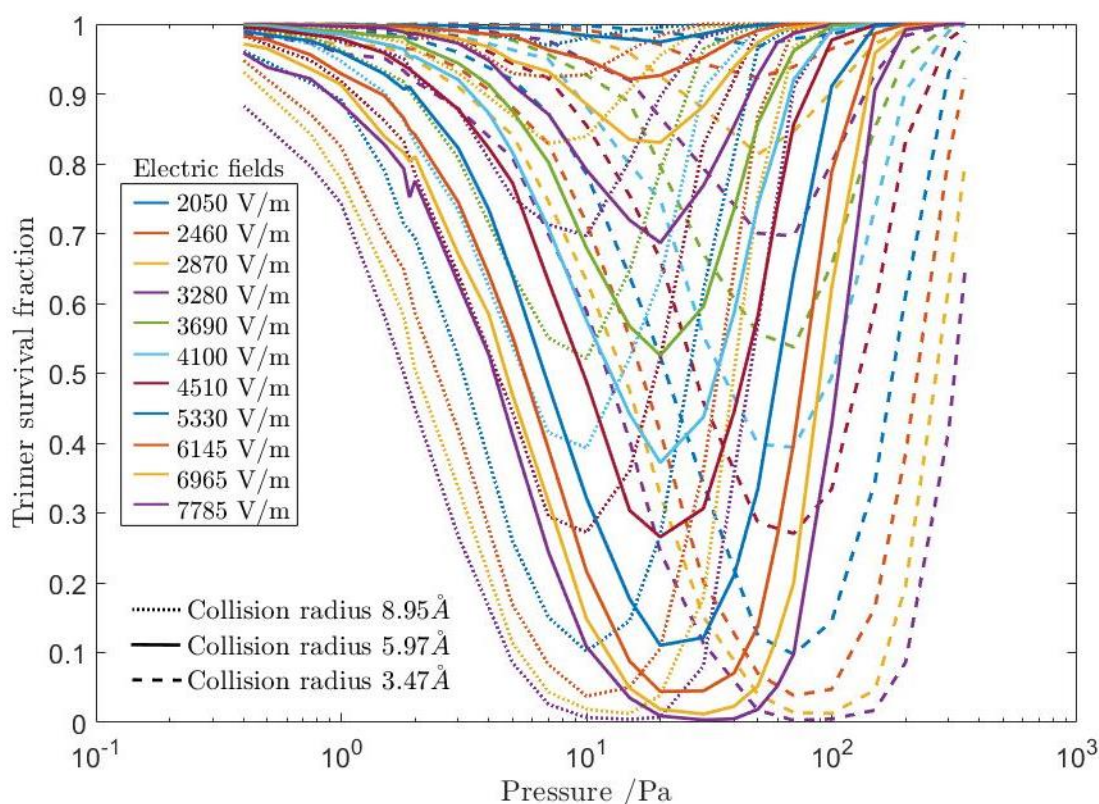

313

314 Figure S17. Dependence of the sulfuric acid trimer (SA)<sub>3</sub><sup>-</sup> fragmentation on pressure at different  
315 values of electric field and collision radius.

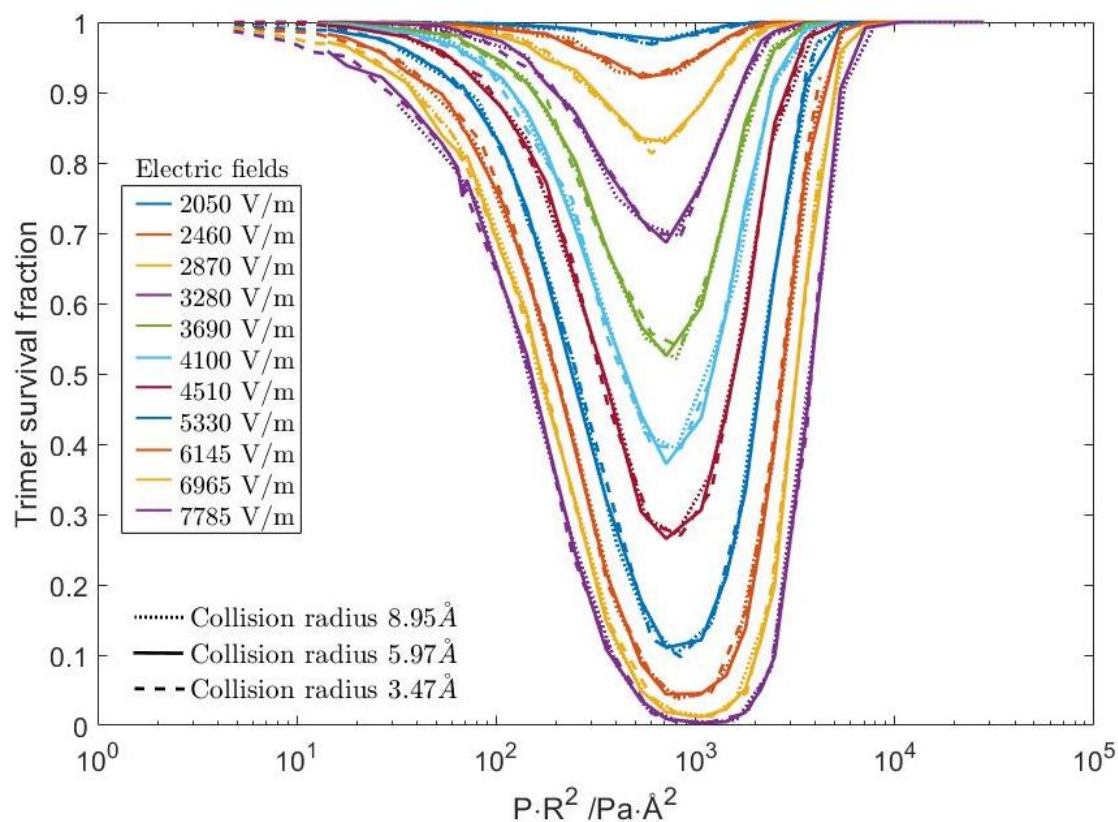

317

318 Figure S18. Dependence of the sulfuric acid trimer  $(SA)_3^-$  fragmentation on pressure (P) and  
 319 collision radius (R) at different values of electric field.

320

321 Figures 17 and 18 show the results of the same simulations at different pressures, collision radii and  
 322 electric fields. We can see that if the trimer survival fraction is plotted versus the product of pressure  
 323 and collision radius in the second power, all curves with the same electric field merge into one.

324

## 325 8. Modelling the pressure inside the APi

326 The measured pressure corresponds to the area where the pressure sensor is connected, roughly in the  
 327 middle of the chambers. However, for accurate modelling of the cluster fragmentation we need to  
 328 know the density and temperature of the carrier gas also near and inside the skimmers connecting the  
 329 chambers. The diameter of the skimmer orifice between the first and second chambers is much greater

330 than the mean free path at the end of the first chamber. Therefore, we have considered the outgoing  
331 flow from the first chamber as continuous. The velocity of the flux, pressure, density and temperature  
332 inside the skimmer have been calculated using the Bernoulli principle, adiabatic expansion and  
333 continuity equations. Right after the end of the skimmer, at the beginning of the second chamber, the  
334 pressure, density and temperature reach, within the length of the mean free path the conditions of the  
335 second chamber. According to the heat and mass balance calculations the temperature of the second  
336 chamber far from the orifices is close to room temperature.

337 The accurate calculation of the fluid dynamics factors in the interface between the first and second  
338 chambers requires considerable efforts. Before undertaking this problem, we have varied in the model  
339 the dimensions of the skimmer. We have seen changes up to 7% in the degree of cluster  
340 fragmentation. However, these changes are not dramatic enough to affect our main conclusions.  
341 Therefore, we have postponed the detailed study of the fluid dynamics in the interface between the  
342 first and the second chambers.

343 The diameter of the orifice of the skimmer between the second and the third chambers is less than the  
344 mean free path in this area. Therefore, for the calculation of the collision PDF near the skimmer to  
345 the third chamber, we assume that there are no carrier gas molecules coming from the orifice area  
346 that the cluster can collide with.

347

## 348 9. Uncertainties evaluation of the simulations

349 The sources of uncertainties in our model can be divided into three groups. The first group is related  
350 to the physical principles involved in the simulation, especially the details of the energy transfer at  
351 collisions. The second group is corresponds to the calculated parameters of the cluster. The third  
352 group is connected to our incomplete knowledge of the simulated system.

353 Thorough evaluation of the first group is outside of the scope of the present study. We just mention  
354 here the crucial role that conservation laws play in the energy transfer process. Also, our energy  
355 transfer model assumes that there are no obstacles for energy flow to the internal modes of the cluster,  
356 as long as the energy levels are available. This principle leads to maximal possible energy transfer to  
357 the cluster internal modes at collisions. The validity of these assumptions can be checked by  
358 molecular dynamics simulations.

359 The cluster parameters such as density of states and radius are calculated by quantum chemistry using  
360 rigid-rotor-harmonic approximation. It has been widely discussed that this approximation works  
361 relatively well, despite the obvious errors introduced by rotational-vibrational coupling,  
362 anharmonicity of the vibrations and treatment of the lowest modes as vibrations. The role of the  
363 quantum chemistry method is significant. We have compared fragmentation energies calculated by  
364 two methods: DFT level PW91/aug-cc-pVQZ and DLPNO-CCSD(T)/aug-cc-pVTZ// PW91/aug-cc-  
365 pVQZ level of theory with a tight pair natural orbital criteria. The first method gives 25.46 kcal/mol  
366 while the second, more accurate method gives 29.3 kcal/mol. We have run simulations at conditions  
367 of the Cases A and B (see the main text) for the fragmentation rate constant based on these two  
368 methods. As we can see from Figure S19, the more accurate quantum chemistry method produces  
369 results closer to the experimental data, however, the DFT-based method also performs reasonably  
370 well.

371 The uncertainty in the fluid dynamics has been already discussed in the previous section. Another  
372 example of the incomplete knowledge is the shape of electrodes. It is unknown to us and we assumed  
373 that electric field due to them is as they were the infinite plates like in a flat capacitor. Obviously, the  
374 electrodes have holes for passing of the ions. We have estimated how possible corrections to the  
375 electric fields due to the edge effects can change the degree of the cluster fragmentation. Variation of  
376 the electric field when the ion passes through electrode from zero to the one equal to the electric field  
377 from the infinite plate has shown the possible effect on the level of the cluster fragmentation to be

378 about 25%. For the Figure 5 of the main text we have used averages over these two extreme cases for  
 379 the electric field.

380 We see that for accurate modelling of the experimental results on the cluster fragmentation inside the  
 381 mass spectrometer, one needs detailed knowledge of the system, and thorough methods for  
 382 calculation of the cluster parameters. However, the results of the present study allow us to conclude  
 383 that even with incomplete knowledge of the system, the effect of the cluster fragmentation on the  
 384 results of the mass spectrometer measurements can be estimated relatively well.

385

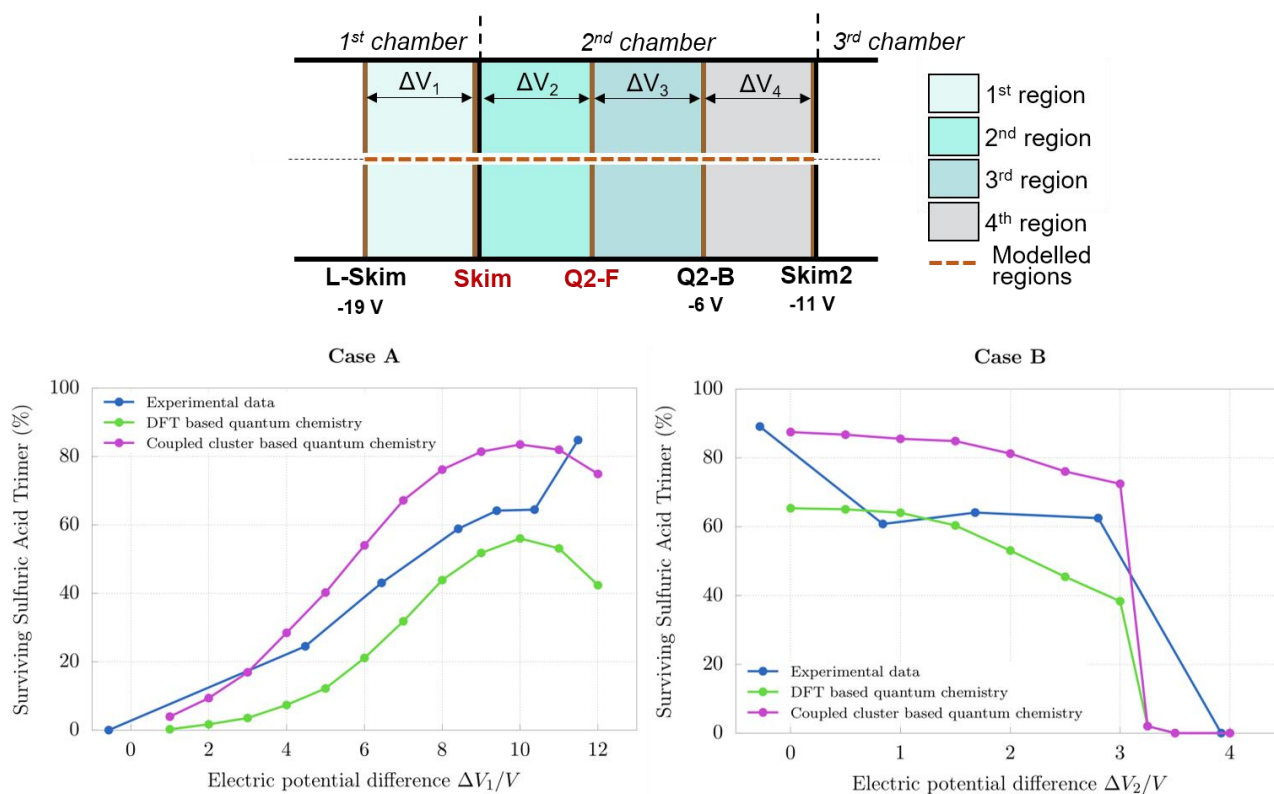

386

387 Figure S19. Comparison of the simulation results performed with two different fragmentation rate  
 388 constants based on two quantum chemical methods. In the upper panel a schematic representation  
 389 of the region between Lens Skimmer and Skimmer2. The lower panel shows the experimental and  
 390 modelled  $R_{(SA)_3^-}$  as a function of the electric potential difference between to electrodes ( $\Delta V$ ). In the  
 391 graph A the experimental and modelled  $R_{(SA)_3^-}$  is reported as a function of  $\Delta V_1$ . During these  
 392 experiments and corresponding simulations only the voltages applied to the Skimmer were changed.



393 In the graph B the experimental and modelled  $R_{(SA)_3^-}$  is reported as a function of  $\Delta V_2$ . During these  
394 experiments and simulations only the voltages applied to the Q2-Front were changed.

395

## 396 10. References

- 397 [1] a) F. Bianchi et al., *Environ. Sci. Technol.* **2014**, *48*, 13675-13684; b) T. Jokinen, M. Sipilä, H.  
398 Junninen, M. Ehn, G. Lönn, J. Hakala, T. Petäjä, R. L. Mauldin III, M. Kulmala, D. R. Worsnop,  
399 *Atmos. Chem. Phys.* **2012**, *12*, 4117-4125; c) A. Kürten, L. Rondo, S. Ehrhart, J. Curtius, *Atmos.*  
400 *Meas. Tech.* **2011**, *4*, 437-443.
- 401 [2] J. Kangasluoma, M. Attoui, F. Korhonen, L. Ahonen, E. Siivola, T. Petäjä, *Aerosol Sci. Technol.*  
402 **2016**, *50*, 222-229.
- 403 [3] H. Junninen et al., *Atmos. Meas. Tech.* **2010**, *3*, 1039-1053.
- 404 [4] F. D. Lopez-Hilfiker, S. Iyer, C. Mohr, B. H. Lee, E. L. D'Ambro, T. Kurtén, J. A. Thornton,  
405 *Atmos. Meas. Tech.* **2016**, *9*, 1505-1512.
- 406 [5] M. Heinritzi, M. Simon, G. Steiner, A. C. Wagner, A. Kürten, A. Hansel, J. Curtius, *Atmos. Meas.*  
407 *Tech.* **2016**, *9*, 1449-1460.
- 408 [6] M. J. Frisch et al., *Gaussian 16* **2016**, revision A.03; *Gaussian, Inc.: Wallingford, CT*
- 409 [7] F. Neese, *Wiley Interdiscip. Rev. Comput. Mol. Sci.* **2012**, *2*, 73-78.
- 410 [8] J. Elm, M. Bilde, K. V. Mikkelsen, *J. Phys. Chem. A* **2013**, *117*, 6695-6701.
- 411 [9] J. J. P. Stewart, *J. Mol. Model.* **2007**, *13*, 1173-1213.
- 412 [10] J. P. Perdew, Y. Wang, *Phys. Rev. B: Condens. Matter Mater. Phys.* **1992**, *45*, 13244-13249.
- 413 [11] a) N. Myllys, J. Elm, R. Halonen, T. Kurtén, H. Vehkamäki, *J. Phys. Chem. A* **2016**, *120*, 621-  
414 630; b) C. Riplinger, P. Pinski, U. Becker, E. F. Valeev, F. Neese, *J. Chem. Phys.* **2016**, *144*,  
415 024109.
- 416 [12] E. Zapadinsky, M. Passananti, N. Myllys, T. Kurtén, H. Vehkamäki, *J. Phys. Chem. A* **2019**, *123*,  
417 611-624.
- 418 [13] D. Spelsberg, W. Meyer, *J. Chem. Phys.* **1994**, *101*, 1282-1288.
- 419
